# Supplementary material for: Comparative Antimicrobial Susceptibility Profiles of Uropathogenic Extended-Spectrum ß-Lactamase Producing Strains of Klebsiella pneumonia and Escherichia coli by the CLSI and EUCAST Methodologies
Source: Preprints.org preprint supplement (doi:10.20944/preprints202003.0095.v1), 2020-03-05
Supplement: Supplementary file 1 [file supplementary]

**Antibiotics(*ISSN 2079-6382; CODEN: ABSNC4*)**

**Copyright Transfer Form**

The copyright to this article is hereby transferred to MDPI, effective if and when the article is accepted for publication.

The copyright transfer covers the exclusive right to reproduce and distribute the article, including reprints, translations, photographic reproductions, microform, electronic form (offline, online) or any other reproductions of similar nature.

 The Author warrants that his contribution is original and that he has full power to make this grant. The Author signs for and accepts responsibility for releasing this material on behalf of any and all Co-authors.

 The undersigned author has submitted a manuscript

Title: ***Comparative Antimicrobial Susceptibility Profiles of Uropathogenic Extended-Spectrum ß-Lactamase Producing Strains of* Klebsiella pneumonia *and* Escherichia coli** ***by the CLSI and EUCAST methodologies.***

for publication in **Antibiotics** **(*ISSN 2079-6382; CODEN: ABSNC4*)**), published by MDPI.

Name: Orhan AKPINAR

Date: 03/04/2020

Signature: 
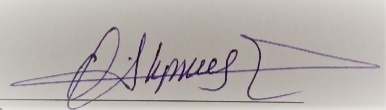


***TİTLE PAGE***

***Orıgınal article***

***Tittle***

Comparative Antimicrobial Susceptibility Profiles of Uropathogenic Extended-Spectrum ß-Lactamase Producing Strains of *Klebsiella pneumonia*and *Escherichia coli*by the CLSI and EUCAST methodologies

***Short Tittle***

Antimicrobial Susceptibility Profiles

**Authors:**

**1.** *Dr.* **Doğan Akdoğan1 MD(**orcid.org/0000-0002-0970-1597)

**2***.Dr***. Mustafa Güzel2 MD, PhD**[(orcid.org/0000-0001-5408-0905](https://orcid.org/0000-0001-5408-0905" \t "_blank))

***3.*** *Dr****.* MD3 *(***orcid.org/0000-0001-8103-7072)

***4****.Assocıate professor Dr***.Altan Aksoy MD4 (**orcid.org/0000-0001-7939-3481)

***5****.Assistant professor Dr***. Orhan Akpınar5 MD, PhD.(** orcid.org/0000-0001-8397-8247)

**1**.Pursaklar state hospital Departmant of Medical Microbiology,Ankara, Turkey

**2.**Maltepe Medical Center Departmant of Medical Microbiology,Istanbul, Turkey

**3.** Siirt state hospital Departmant of Medical Microbiology, Siirt , Turkey

**4**. Department of microbiology Ankara traınıng and research hospıtal, University of health sciences, Ankara,Turkey

**5.**Department of microbiology, Health Sciences Institute ,University of Süleyman Demirel.

Isparta/Turkey

**Address for correspondence:**

Orhan AKPINAR

Department of microbiology, Faculty of Dentıstry , Süleyman Demirel Üniversity , **East**

**campus** 32260 **Çünür/ Isparta/Turkey**

Phone: **+90 246 211 33 34**

**Fax: +90 246 237 0 607**

**E-mail:** [orhanakpnr@hotmail.com](mailto:orhanakpnr@hotmail.com)

No previous presentation has been made related to article data and findings

**Conflicts of interest:** The authors had no conflicts of interest to declare in relation to this article.

**Financial support and sponsorship:**There is no financial support and sponsorship.

**Author Contributions:** DA,OA and MG. conceptualized the study YB and AA. performed the experiments.OA and DA analyzed the results.DA ,OA,MG Writing – review and editing. All authors have read and agreed to the published version of the manuscript.

**Acknowledgments:** The authors thank the members of the Research Laboratory of Ankara traınıng and research hospıtal, University of health sciences,

**Conflicts of Interest:** The authors declare no conflict of interest.
